# Supplementary material for: Surface defect-engineered CeO2−x by ultrasound treatment for superior photocatalytic H2 production and water treatment
Source: Royal Society of Chemistry journal article supplement (doi:10.1039/d1cy01940f), 2022-01-01
Supplement: d1cy01940f1.pdf [file d1cy01940f1.pdf]

## Electronic supplementary information

### Surface defect engineered CeO<sub>2-x</sub> by ultrasound treatment for superior photocatalytic H<sub>2</sub> production and water treatment

Sujay Shekar G. C.<sup>1</sup>, Khaled Alkanad<sup>1</sup>, Gubran Alnaggar<sup>2</sup>, Nabil Al-Zaqri<sup>3</sup>, Mohammed Abdullah Bajiri<sup>4</sup>, Thejaswini B.<sup>5</sup>, Dhileepan M. D.<sup>6</sup>, Bernaurdshaw Neppolian<sup>6</sup>, Lokanath N. K.<sup>1\*</sup>

<sup>1</sup>Department of Studies in Physics, University of Mysore, Manasagangotri, Mysuru 570006, India

<sup>2</sup>Department of Studies in Chemistry, University of Mysore, Manasagangotri, Mysuru 570006, India

<sup>3</sup>Department of Chemistry, College of Science, King Saud university, Riyadh 11451, Saudi Arabia

<sup>4</sup>Department of Studies and Research in Industrial Chemistry, School of Chemical Sciences, Kuvempu University, Shankaraghatta 577451, India

<sup>5</sup>PG Department of Physics, St. Philomena's College, University of Mysore, Bannimantap, Mysuru 570015, India

<sup>6</sup>Energy and Environmental Remediation Lab, SRM-Research Institute of Science and Technology, Chennai 603203, India

\*E-mail: [lokanath@physics.uni-mysore.ac.in](mailto:lokanath@physics.uni-mysore.ac.in)

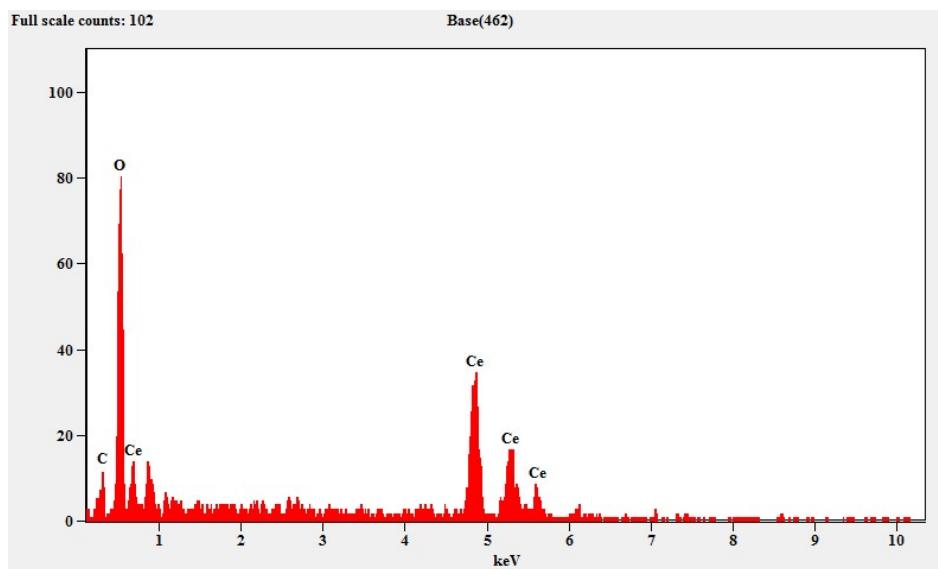

Figure S1. EDAX study of U-CeO<sub>2-x</sub> sample.

**Table S1. Relative surface concentration of  $Ce^{3+}$  and oxygen vacancy based on XPS analysis.**

| Catalyst       | $Ce^{3+}$ % | $Ce^{4+}$ % | $O_c$ % | $H_2$ production<br>( $\mu\text{mol h}^{-1} \text{g}^{-1}$ ) | BB degradation<br>(in %) | Phenol degradation<br>(in %) |
|----------------|-------------|-------------|---------|--------------------------------------------------------------|--------------------------|------------------------------|
| $CeO_2$        | 54.44       | 45.56       | -       | 950                                                          | 44                       | 39                           |
| U- $CeO_{2-x}$ | 59.54       | 40.46       | 15.64   | 2570                                                         | 95.2                     | 94.5                         |

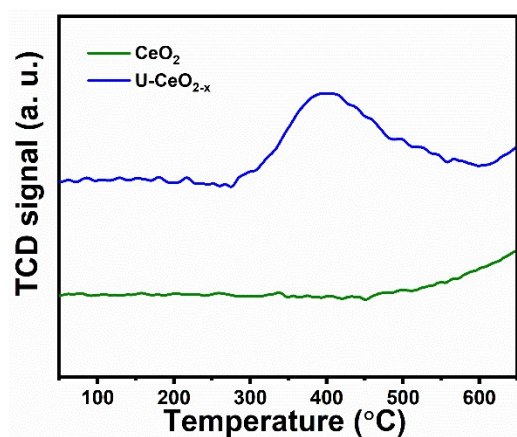

**Figure S2. TPR spectra of the synthesized samples.**

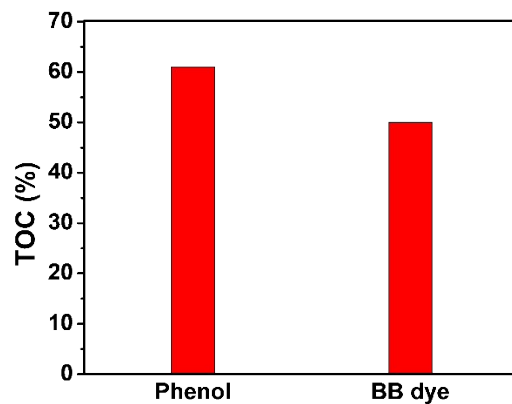

**Figure S3. TOC analysis of the BB dye and phenol.**

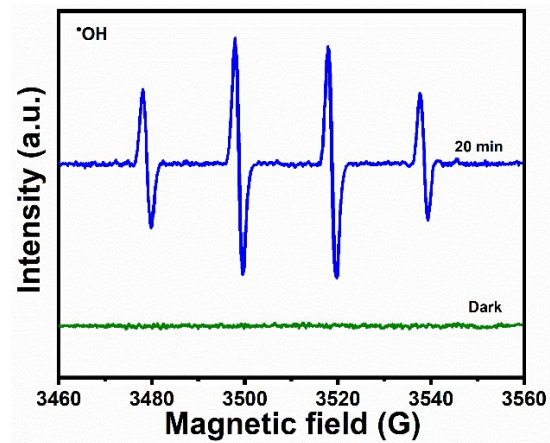

Figure S4. ESR spectra detecting  $\cdot\text{OH}$  in the presence of DMPO in water.

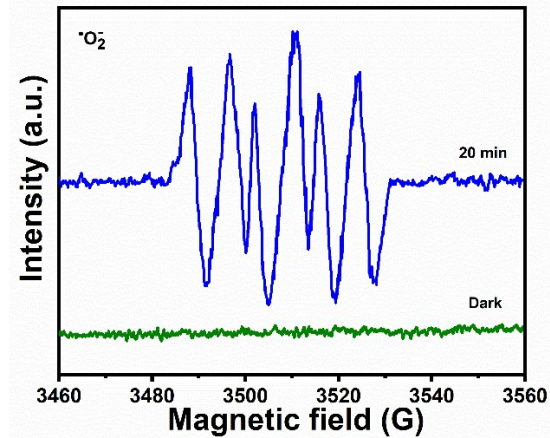

Figure S5. ESR spectra detecting  $\cdot\text{O}_2^-$  in the presence of DMPO in methanol.

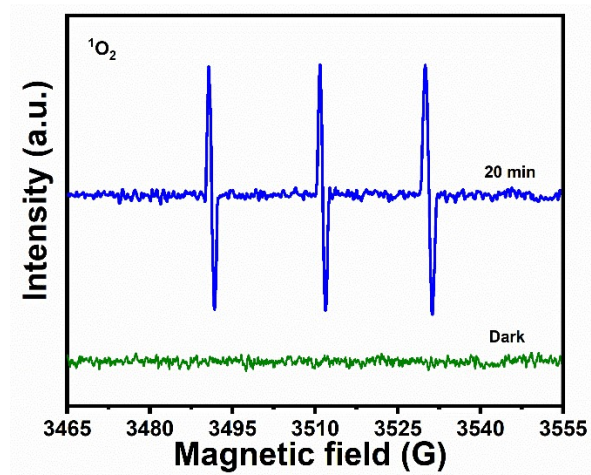

Figure S6. ESR spectra detecting  $^1\text{O}_2$  in the presence of TEMP.

**Table S2. Reported literatures of BB dye and phenol degradation.**

| Catalyst                                                         | Degradation factors                                                       | Pollutant | Degradation efficiency (%) | Reaction time (mins) | Reference |
|------------------------------------------------------------------|---------------------------------------------------------------------------|-----------|----------------------------|----------------------|-----------|
| WO <sub>3</sub> -ZnO                                             | Sonocatalytic degradation<br>Dosage: 2 g/L                                | BB dye    | 90                         | 40                   | 1         |
| TiO <sub>2</sub>                                                 | Dosage: 0.5 g/L<br>pH: 6<br>H <sub>2</sub> O <sub>2</sub> : 0.2 mmol/L    | BB dye    | 97.7                       | 180                  | 2         |
| ZnO                                                              | Dosage: 0.35 mg/L<br>pH: 3<br>Temperature: 35 °C                          | BB dye    | 90                         | 15                   | 3         |
| Ag-ZnO                                                           | Dosage: 0.08 mg/L<br>pH: 12                                               | BB dye    | 97.14                      | 180                  | 4         |
| Bi <sub>2</sub> WO <sub>6</sub>                                  | Dosage: 0.75 g/L<br>pH: 12<br>H <sub>2</sub> O <sub>2</sub> : 0.04 mmol/L | BB dye    | >99                        | 300                  | 5         |
| NCN/BiWO                                                         | Dosage: 1 g/L                                                             | Phenol    | 93.1                       | 240                  | 6         |
| g-C <sub>3</sub> N <sub>4</sub> /CNT/BiVO <sub>4</sub>           | H <sub>2</sub> O <sub>2</sub> : 5 % vol                                   | Phenol    | 80.6                       | 120                  | 7         |
| 2D-CN                                                            | Dosage: 0.5 g/L                                                           | Phenol    | >90                        | 60                   | 8         |
| Bi <sub>2</sub> O <sub>3</sub> /Bi <sub>2</sub> MoO <sub>6</sub> | Dosage: 0.08 g/L                                                          | Phenol    | 96.4                       | 180                  | 9         |
| MgO@Ag-TiO <sub>2</sub>                                          | Dosage: 0.2 g/L                                                           | Phenol    | 95                         | 120                  | 10        |

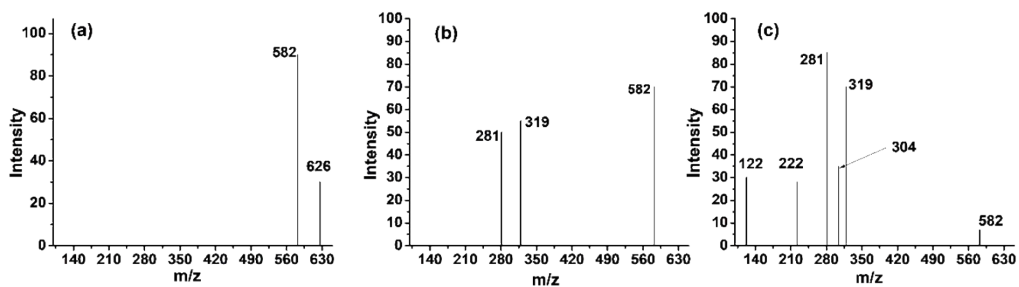

Figure S7. LC-MS spectra of BB dye at (a) 0 min (b) 10 mins (c) 30 mins.

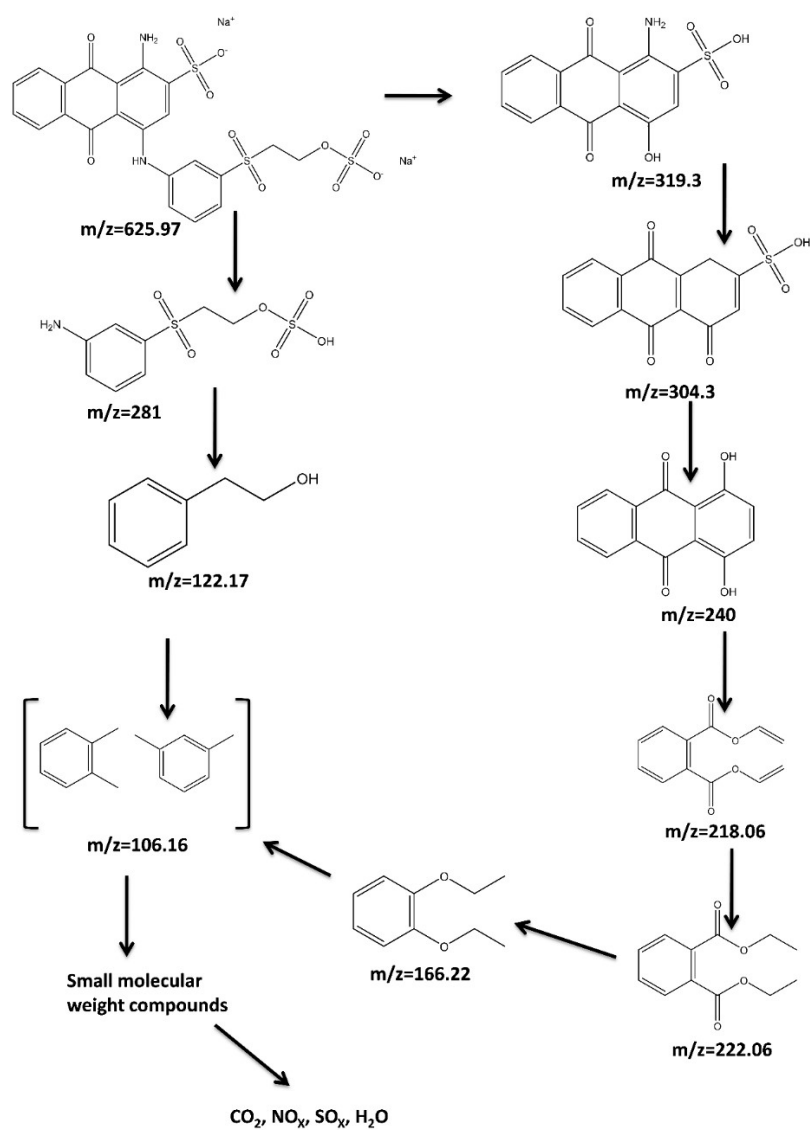

**Figure S8. Degradation pathway of BB dye.**

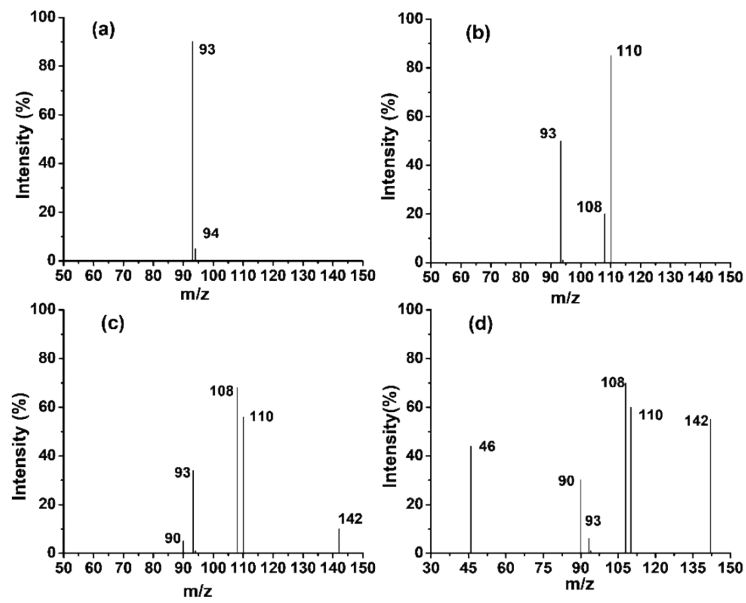

**Figure S9. LC-MS spectra of Phenol at (a) 0 min (b) 10 mins (c) 30 mins (d) 80 mins.**

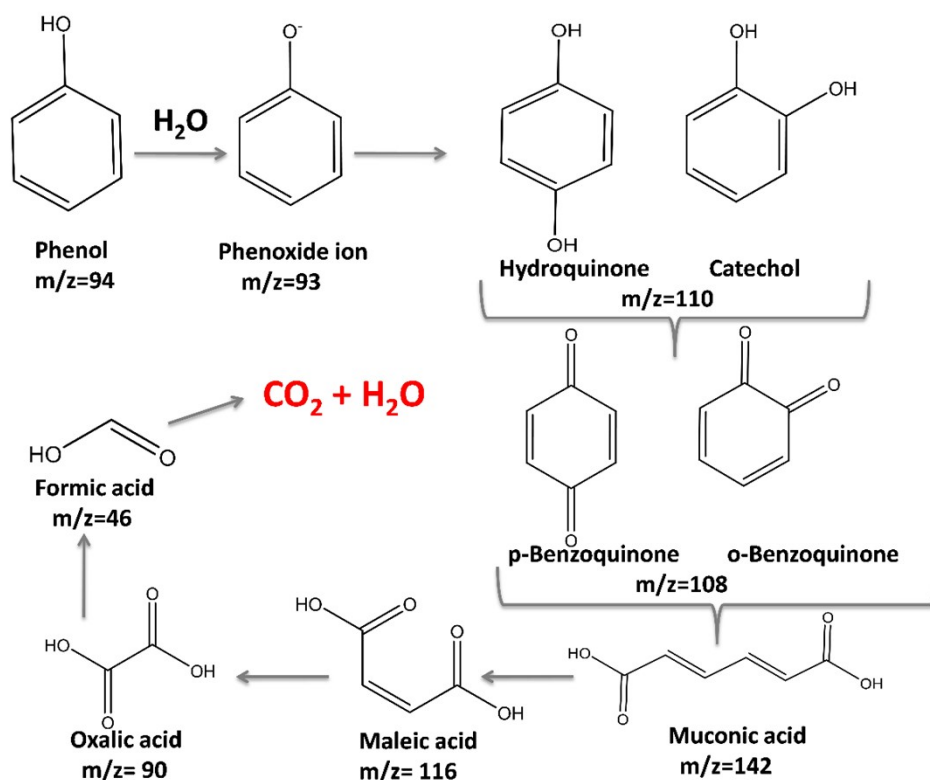

**Figure S10. Degradation pathway of Phenol.**

## References

1. Y. Hunge, A. Yadav and V. Mathe, *Ultrason. Sonochem.*, 2018, **45**, 116-122.
2. Y. Liu, L. Hua and S. Li, *Desalination*, 2010, **258**, 48-53.
3. S. Su, S. Lu and W. Xu, *Mater. Res. Bull.*, 2008, **43**, 2172-2178.
4. T. Parvin, N. Keerthiraj, I. A. Ibrahim, S. Phanichphant and K. Byrappa, *International Journal of Photoenergy*, 2012, **2012**.
5. N. A. Shad, M. Zahoor, K. Bano, S. Z. Bajwa, N. Amin, A. Ihsan, R. A. Soomro, A. Ali, M. I. Arshad and A. Wu, *Inorg. Chem. Commun.*, 2017, **86**, 213-217.

6. D. Zhu and Q. Zhou, *Appl. Catal. B*, 2020, **268**, 118426.
7. M. F. R. Samsudin, N. Bacho, S. Sufian and Y. H. Ng, *J. Mol. Liq.*, 2019, **277**, 977-988.
8. H. Lv, Y. Huang, R. T. Koodali, G. Liu, Y. Zeng, Q. Meng and M. Yuan, *ACS applied materials & interfaces*, 2020, **12**, 12656-12667.
9. F. Fu, H. Shen, W. Xue, Y. Zhen, R. A. Soomro, X. Yang, D. Wang, B. Xu and R. Chi, *J. Catal.*, 2019, **375**, 399-409.
10. T. Scott, H. Zhao, W. Deng, X. Feng and Y. Li, *Chemosphere*, 2019, **216**, 1-8.
